# Supplementary material for: Metal-free oxygen reduction electrodes based on thin PEDOT films with high electrocatalytic activity
Source: Royal Society of Chemistry journal article supplement (doi:10.1039/c3ra46167j), 2014-01-01
Supplement: c3ra46167j.pdf [file c3ra46167j.pdf]

**Metal-free oxygen reduction electrodes based on thin PEDOT films with high electrocatalytic activity**

Philip P. Cottis, Drew Evans, Manrico Fabretto, Peter Murphy, Pejman Hojati-Talemi\*

(Electronic Supplementary Information)

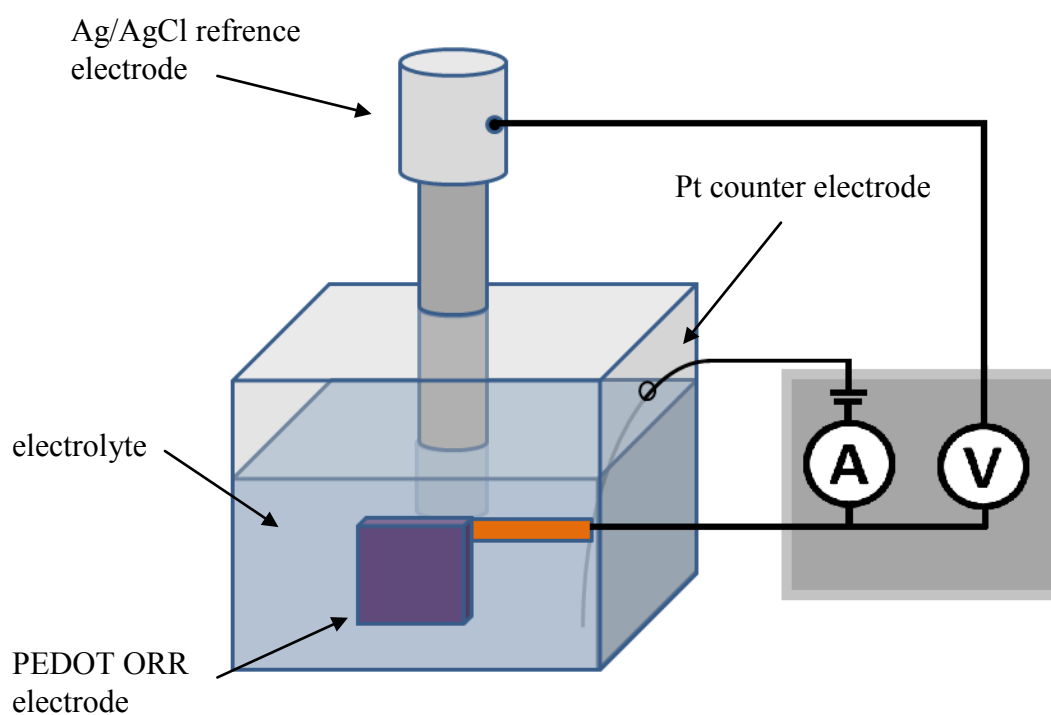

**Figure S1.** A schematic view of the three-electrode cell experimental setup used for ORR performance measurement.

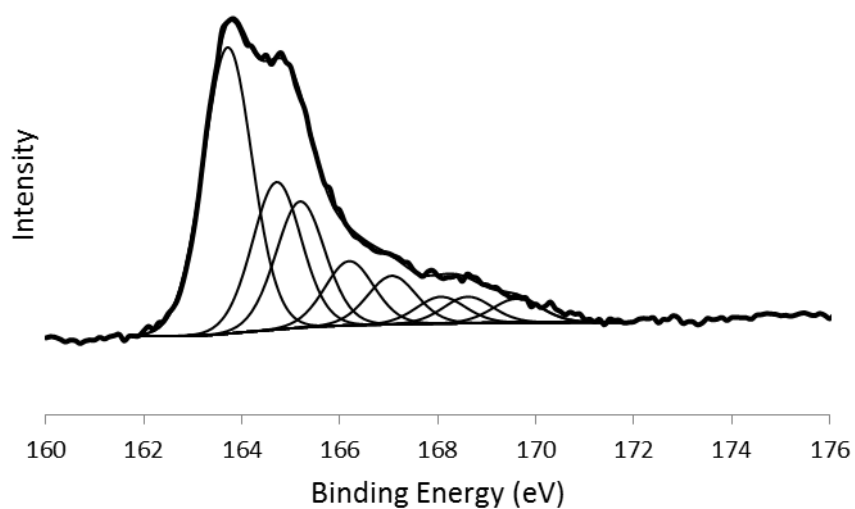

**Figure S2.** Typical deconvolution of S2p peak of XPS spectrum of PEDOT based 5800 Da block copolymer.

**Table S1.** The outcome of deconvolution of S2p peak of XPS spectrum of PEDOT samples and the calculated doping level.

| Position (eV)                    | 163.7                        | 164.7          | 165.2           | 166.2           | 168.6                         | 169.6           | 167.1                      | 168.1                      |            |
|----------------------------------|------------------------------|----------------|-----------------|-----------------|-------------------------------|-----------------|----------------------------|----------------------------|------------|
| Peak assignment                  | Thio <sup>a)</sup><br>S2p1/2 | Thio<br>S2p3/2 | Thio+<br>S2p1/2 | Thio+<br>S2p3/2 | H-Tos <sup>b)</sup><br>S2p1/2 | H-Tos<br>S2p3/2 | Tos <sup>+</sup><br>S2p1/2 | Tos <sup>+</sup><br>S2p3/2 | Dop. Level |
| PEDOT/2900D<br>a PEG-PPG-<br>PEG | 32.78                        | 18.46          | 13.3            | 7.24            | 2.47                          | 2.27            | 13.84                      | 9.64                       | 28.6       |
| PEDOT/5800D<br>a PEG-PPG-<br>PEG | 30.23                        | 16.06          | 15.33           | 7.62            | 3.93                          | 2.84            | 14.45                      | 9.54                       | 33.1       |
| Urea treated<br>PEDOT            | 37.51                        | 18.93          | 15.68           | 8.44            | 3.07                          | 2.60            | 7.73                       | 6.04                       | 29.9       |

<sup>a)</sup>: Thio: S atom in thiophene rings of PEDOT; <sup>b)</sup>: Tos: S atoms of tosylat groups.

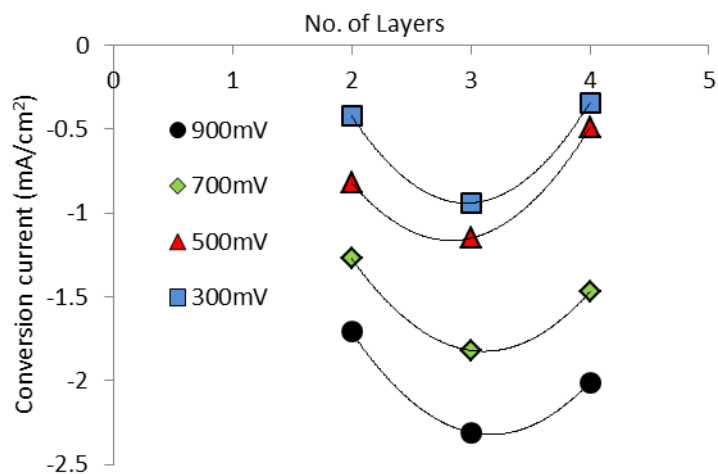

**Figure S3.** Conversion current density versus number of PEDOT layers on 220nm membrane, at various potentials,

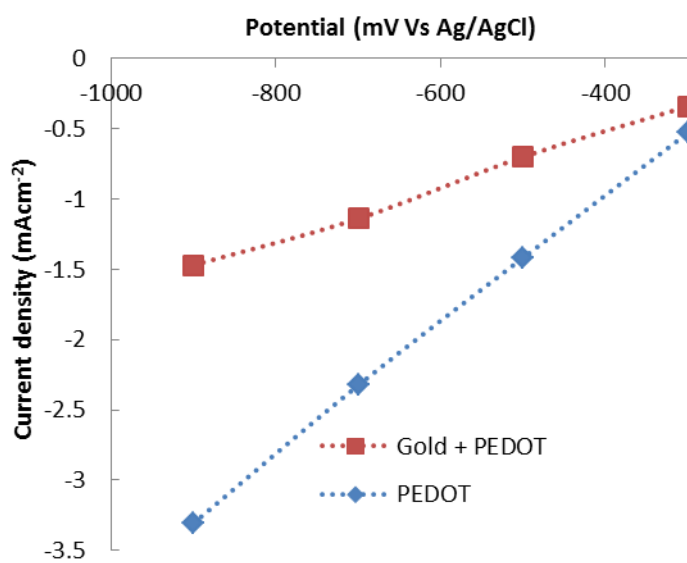

**Figure S4.** Conversion current density as a function of applied potential for PEDOT electrodes with and without a gold under-layer. This test is performed in a pH7 buffer solution.

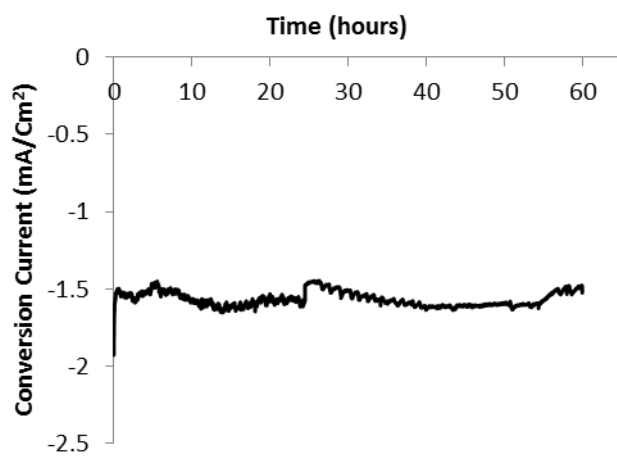

**Figure S5.** Long term testing operating at pH7 and applied potential of -0.5 V.
